# Supplementary material
Source: PubMed Central journal article supplement (PMC5461969)

# Phase Behavior of Mixed Lipid Monolayers in Perfluorocarbon Nanoemulsions and its Effect on Acoustic Contrast

*Rajarshi Chattaraj<sup>§</sup>, Galen M. Goldscheitter<sup>†</sup>, Adem Yildirim<sup>†</sup>, and Andrew P. Goodwin<sup>†\*</sup>*

<sup>§</sup> Department of Mechanical Engineering, University of Colorado Boulder. Boulder, CO 80309.

<sup>†</sup> Department of Chemical and Biological Engineering, University of Colorado Boulder. Boulder, CO 80303.

## TABLE OF CONTENTS

Lateral lipid phase separation on fluorocarbon droplets can enhance ultrasound contrast activity.

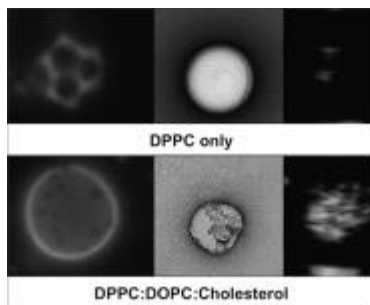

Supplement: NIHMS831992-supplement-ToC.pdf [file NIHMS831992-supplement-ToC.pdf]
